# Supplementary material
Source: publisher figshare collection journal article supplement (https://gsapubs.figshare.com/ndownloader/files/22409022)
Supplement: Supplementary file 1 [file 22409022]

Dusel-Bacon, C., Aleinikoff, J.N., Day, W.C., and Mortensen, J.K., 2015, Mesozoic magmatism and timing of epigenetic Pb-Zn-Ag mineralization in the western Fortymile mining district, east-central Alaska: Zircon U-Pb geochronology, whole-rock geochemistry, and Pb isotopes: Geosphere, v. 11, doi:10.1130/GES01092.1.

Supplemental File 1. Map numbers, sample numbers, location information, and detailed petrographic description of each SHRIMP U-Pb zircon sample from the Fortymile district, east-central Alaska.

| Map No.        | Sample No.    | SHRIMP U-Pb zircon age <sup>1</sup>            | Location / body name                 | Latitude in decimal degree | Longitude in decimal degree | Rock name (minerals listed in decreasing abundance) | Texture                                                                                                                                                                                                                                                  | Qtz (%) | Kfs (%) | Pl (%) | Bt (%) | Hbl (%) | Ms (%) | Cpx (%) | Accessory minerals (decreasing abundance) | Alteration (degree; minerals)                                              |
|----------------|---------------|------------------------------------------------|--------------------------------------|----------------------------|-----------------------------|-----------------------------------------------------|----------------------------------------------------------------------------------------------------------------------------------------------------------------------------------------------------------------------------------------------------------|---------|---------|--------|--------|---------|--------|---------|-------------------------------------------|----------------------------------------------------------------------------|
| Late Triassic  |               |                                                |                                      |                            |                             |                                                     |                                                                                                                                                                                                                                                          |         |         |        |        |         |        |         |                                           |                                                                            |
| 1              | 09AD-319      | 215.5 ± 3.4                                    | small body E of Mt. Veta intrusion   | 64.11043                   | -143.18031                  | Metamorphically overprinted Hbl Qtz diorite         | Medium-grained, hypidiomorphic granular, with weakly developed foliation defined by 1-3 (up to 7) mm Hbl laths. Greenschist facies alteration localized in shear bands                                                                                   | 15      |         | 35     |        | 40      |        |         | Ttn, Fe-Ti oxide, Ap, Zrn                 | Locally strong Hbl to Ep and Chl; Pl to Ser (green-schist facies minerals) |
| 2              | 08ADb24       | 215.0 ± 3.5                                    | pluton of Kechumstuk Mtn.            | 64.089167                  | -143.03778                  | Hbl-Bt granodiorite                                 | Medium-grained, hypidiomorphic granula; weakly developed local alignment of Hbl laths                                                                                                                                                                    | 20      | 5       | 55     | 5      | 15      |        | Trace   | Mag, Ilm, Ttn, Zrn, Ap                    | Moderate; Hbl to Bt, Chl and Fe-Ti oxide; Fs to clay                       |
| 3              | 79AFr2005     | 212.0 ± 3.3                                    | Taylor Mtn. batholith                | 63.98111                   | -142.15222                  | Hbl-Bt Qtz monzodiorite                             | Medium-grained, hypidiomorphic granula; weakly developed local alignment of Hbl laths                                                                                                                                                                    | 10      | 5       | 60     | 10     | 15      |        |         | Ttn, Mag, Ep, Zrn                         | Minor; Hbl to Ep or Zo                                                     |
| 4              | 09AD-338      | 207.9 ± 2.9                                    | small body within Mt. Veta intrusion | 64.10511                   | -143.11206                  | Foliated Hbl leucotonalite                          | Medium-grained, hypidiomorphic granular, foliation defined by trains of 1 mm Hbl laths and elongate patches of polygonized and strained quartz; Kfs in interstitial sub-mm patches; euhedral Ttn to 0.5 mm                                               | 40      | 5       | 45     |        | 10      |        |         | Ttn, Zrn, Ap                              | Minor; cores of largest (2 mm) Pl to clay; Hbl to Act                      |
| Early Jurassic |               |                                                |                                      |                            |                             |                                                     |                                                                                                                                                                                                                                                          |         |         |        |        |         |        |         |                                           |                                                                            |
| 5              | 09AD-240      | 190.5 ± 4.8 with ~1.0 – 2.0 Ga inherited cores | small body W of Mt. Veta intrusion   | 64.18772                   | -143.13098                  | Foliated, altered leucogranite                      | Foliated, medium-grained, hypidiomorphic granular, highly altered granitoid. Kfs mostly as interstitial masses and euhedral Pl is mostly altered to Ser. Trains of strained and polygonized Qtz and fibrous Chl (likely former Bt) define the foliation. | 20      | 35      | 40     |        |         |        |         | Ttn, Zrn, Ap                              | Intense; all mafic grains to Chl, Ep and Zo; most Pl to Ser and minor Ep   |
| 6              | LWM 07-09-208 | 187.7 ± 2.3                                    | sill in LWM drill core               | 64.23379                   | -142.82556                  | Altered Bt-bearing felsic dike                      | Fine-grained, carbonate- and Ser-altered rock containing thin, 0.5-1 mm long, aligned Bt books with Fe-rich margins and carbonate interiors. Fine-grained Qtz-Fs matrix interspersed with alteration Ser. Carbonate veins cut sample.                    | 50      | 2       | 40     | 3      |         |        |         | Ap                                        | Intense; Pl to Ser and Ab; Bt to carbonate                                 |
| 7              | 08ADb22       | 186.2 ± 3.0                                    | Mt. Veta intrusion                   | 64.093                     | -143.1458                   | Hbl Qtz monzonite                                   | Kfs present as megacrysts (0.5-2 cm, typically 1 cm but up to 5 cm in length) in a medium-grained matrix of Hbl, Kfs, Pl, and Qtz. Moderately to strongly foliated. Myrmekite partially rims K-spar megacrysts.                                          | 10      | 40      | 30     |        | 20      |        |         | Ttn                                       | Minor; Hbl to Chl or Ep                                                    |
| 8              | 08AD-100      | 184.8 ± 2.9                                    | dike W of Mt. Veta intrusion         | 64.1016                    | -143.1905                   | Cpx granodiorite dike                               | Fine-grained, hypidiomorphic granular texture with weakly developed foliation defined by aligned Cpx prisms and elongate patches of strained and polygonized Qtz                                                                                         | 30      | 5       | 30     |        | Trace   |        | 35      | Ttn, Zrn, Ap                              | Minor; Pl to Zo-Czo and clay                                               |

| Map No.        | Sample No. | SHRIMP U-Pb zircon age <sup>1</sup> | Location / body name                                                 | Latitude in decimal degree | Longitude in decimal degree | Rock name (minerals listed in decreasing abundance) | Texture                                                                                                                                                                                                                                                                           | Qtz (%) | Kfs (%) | Pl (%) | Bt (%)              | Hbl (%) | Ms (%) | Cpx (%)                                         | Accessory minerals (decreasing abundance) | Alteration (degree; minerals)                                                                     |
|----------------|------------|-------------------------------------|----------------------------------------------------------------------|----------------------------|-----------------------------|-----------------------------------------------------|-----------------------------------------------------------------------------------------------------------------------------------------------------------------------------------------------------------------------------------------------------------------------------------|---------|---------|--------|---------------------|---------|--------|-------------------------------------------------|-------------------------------------------|---------------------------------------------------------------------------------------------------|
| 9              | 8A5-4      | 184.5 ± 3.0                         | Mt. Veta intrusion                                                   | 64.0599                    | -143.1701                   | Foliated Hbl-Cpx monzonite                          | Coarse-grained monzonite in which aligned tabular Hbl, Ksf, and Pl all define a moderately developed foliation. Many Kfs grains have microcline twinning with locally developed myrmekite.                                                                                        | 1       | 60      | 20     |                     | 16      |        | 3 (pale green color suggests sodic composition) | Fe-Ti oxide, Ttn                          |                                                                                                   |
| 10             | 10AD368    | 183.4 ± 3.6                         | sill in hanging wall of W-vergent thrust, E of Kechumstuk fault zone | 64.20405                   | -142.82817                  | Altered Kfs-megacrystic Hbl-Bt granite porphyry     | Non-foliated, porphyritic. Kfs megacrysts (to 1 cm) occur in a fine-grained matrix of ~1-2 mm microphenocrysts of Bt books, Pl, and completely altered Hbl, and finer grained Ser and Qtz. Veinlets of Cal + Qtz                                                                  | 15      | 45      | 20     | 10                  | 10      |        |                                                 |                                           | Intense; Hbl to Chl, FeTiO oxide, and Cal; groundmass Pl to Ser                                   |
| 11             | 08ADb08    | 181.2 ± 2.6                         | Mt. Veta intrusion                                                   | 64.214444                  | -142.88417                  | Kfs-megacrystic Hbl Qtz monzonite                   | Kfs mostly present as megacrysts (average 2 cm but up to 4 cm in length) in a medium-grained matrix of Hbl, Pl, minor Kfs, and Qtz. Foliation defined by aligned Kfs megacrysts and Hbl laths.                                                                                    | 5       | 35      | 25     |                     | 35      |        |                                                 | Ttn, Ap,                                  | Hbl and Kfs are generally unaltered, but Pl shows moderate alteration to clay and Ser             |
| Mid-Cretaceous |            |                                     |                                                                      |                            |                             |                                                     |                                                                                                                                                                                                                                                                                   |         |         |        |                     |         |        |                                                 |                                           |                                                                                                   |
| 12             | 08ADb20    | 111.8 ± 1.5                         | Corner granite                                                       | 64.008889                  | -143.30972                  | Leucogranite                                        | Medium-grained, hypidiomorphic granular.                                                                                                                                                                                                                                          | 20      | 45      | 35     | 0.5                 |         |        |                                                 |                                           | Moderate; Ksp to clay; Bt to Chl and Fe-Ti oxide                                                  |
| 13             | 08AD-052   | 108.8 ± 1.7                         | Corner granite                                                       | 64.0286                    | -143.2464                   | Altered Bt granite                                  | Medium-grained, highly altered rock in which most primary minerals have been replaced by finer grained alteration products: Bt now forms 2 mm-wide clots of fibrous mats of Bt + Chl; matrix altered to clay + Ser + Fe-Ti oxide; Qtz has undulose extinction and irregular habit | 20      | 40      | 25     | 13 (pre-alteration) | 2       |        |                                                 |                                           | Intense; Fs to clay and Ser; Bt and Hbl to Chl and Fe-Ti oxide                                    |
| 14             | 10ADb23    | 103.2 ± 1.5                         | Mt. Harper batholith                                                 | 64.238333                  | -143.810278                 | Bt granite                                          | Medium-grained hypidiomorphic granular. Ksp forms interstitial anhedral grains up to 1 cm; avrg ~ 4 mm; commonly perthitic. Pl cores preferentially sericitized. Bt grains commonly form clots.                                                                                   | 25      | 40      | 25     | 10                  |         |        |                                                 | Zrn                                       | Minor; Bt. to Chl; Pl to Ser bt gen. in fine-grd clots                                            |
| 15             | 10ADb26A   | 101.4 ± 1.4                         | dike cutting Mt. Harper batholith                                    | 64.208889                  | -143.798333                 | Aplitie dike cut by Qtz veinlets                    | Fine-grained matrix containing ~1 mm microphenocrysts of Qtz, Pl and Kfs                                                                                                                                                                                                          | 30      | 40      | 30     |                     |         |        |                                                 | Trace amount of Fe-Ti oxide, Zrn          |                                                                                                   |
| 16             | 10ADb25    | 96.2 ± 1.3                          | dike cutting Mt. Harper batholith                                    | 64.208889                  | -143.798889                 | Qtz-Pl granodioritic porphyry dike                  | Medium-grained, hypidiomorphic granular to weakly porphyritic; 1-2 mm glomeroporphyritic quartz phenos surrounded by completely altered ~1 mm Pl laths and 0.5-1 mm altered Bt                                                                                                    | 30      | 5?      | 40     | 3 ( now Chl)        | 3       |        |                                                 | Zrn                                       | Intense; Pl to Ser and Cal; Bt to Chl and Ser                                                     |
| 17             | 09AD-343   | 95.8 ± 1.5                          | porphyry intrusion cutting Corner granite                            | 64.03307                   | -143.22725                  | Altered Qtz-Fs-Bt granitic porphyry                 | Porphyritic texture with 1-3 mm Kfs and Pl phenocrysts (polycrystalline intergrowths of Fs grains common) and 1-3 mm (to 1 cm) euhedral and glomerocrystic Qtz set in a fine-grained matrix. Fs rarely to 2 cm long. Qtz appears "smokey" megascopically.                         | 30      | 30      | 35     | 5 (pre-alteration)  |         |        |                                                 | Fe-Ti oxide, Zrn, Aln, Ep                 | Intense; all Bt to Chl and Fe-Ti oxide; Fs to clay and Ser (alteration of Pl > than that of Kfs). |

| Map No.         | Sample No. | SHRIMP U-Pb zircon age <sup>1</sup> | Location / body name                                                     | Latitude in decimal degree | Longitude in decimal degree | Rock name (minerals listed in decreasing abundance) | Texture                                                                                                                                                                                                                                                                                                                           | Qtz (%) | Kfs (%) | Pl (%) | Bt (%) | Hbl (%) | Ms (%) | Cpx (%) | Accessory minerals (decreasing abundance) | Alteration (degree; minerals)                                                                           |
|-----------------|------------|-------------------------------------|--------------------------------------------------------------------------|----------------------------|-----------------------------|-----------------------------------------------------|-----------------------------------------------------------------------------------------------------------------------------------------------------------------------------------------------------------------------------------------------------------------------------------------------------------------------------------|---------|---------|--------|--------|---------|--------|---------|-------------------------------------------|---------------------------------------------------------------------------------------------------------|
| 18              | 08AD-032A  | 93.9 ± 1.3                          | small porphyry within splays of Kechumstuk fault zone                    | 64.0530                    | -143.1248                   | Altered Qtz-Pl rhyolite porphyry                    | Porphyritic texture with 3-5 mm diameter euhedral grains and glomerocrysts of Qtz and 3-8 mm-long altered Pl laths are set in a cryptocrystalline potassic matrix (likely altered Ksp and Qtz). Some Qtz grains have embayed margins.                                                                                             | 30?     | 40?     | 30?    |        |         |        |         | Zrn                                       | Intense; Fs to clay or Ser; areas containing minute Fe-Ti oxide may have been Bt; only Qtz is unaltered |
| Late Cretaceous |            |                                     |                                                                          |                            |                             |                                                     |                                                                                                                                                                                                                                                                                                                                   |         |         |        |        |         |        |         |                                           |                                                                                                         |
| 19              | 10ADb22    | 70.0 ± 1.2                          | Middle Fork caldera                                                      | 64.296111                  | -143.111944                 | Qtz-Pl-Bt rhyolite tuff                             | Qtz, P, Bt and Ksp present as 1-2 mm long phenocrysts in a cryptocrystalline to fine-grained de-vitrified groundmass of Qtz and Kfs(?). Qtz Qtz phenocrysts are commonly irregular shaped, due to fracture along embayments and crystallized melt inclusions. Fiamme locally visible on weathered surfaces of outcrop.            | 40      | 20      | 35     | 5      |         |        |         | Fe-Ti oxide, Zrn; Ttn, Ap                 |                                                                                                         |
| 20              | 10ADb17    | 69.7 ± 1.2                          | Middle Fork caldera                                                      | 64.311389                  | -143.141667                 | Fs-Qtz-Bt granite porphyry                          | Pl, Kfs, Qtz, and Bt occur as 2-4 mm-long phenocrysts in fine-grained groundmass. of euhedral Qtz surrounded by Kfs. Qtz phenocrysts are commonly embayed with crystallized melt inclusions; Pl commonly as glomerocrysts. Ksp phenocrysts rarely up to 2.5 cm with Qtz and Bt inclusions.                                        | 30      | 30      | 30     | 10     |         |        |         | Fe-Ti oxide, Zrn                          |                                                                                                         |
| 21              | 118A5      | 68.1 ± 0.8                          | dike within Kechumstuk fault near Mitchell prospect                      | 64.09184                   | -143.03780                  | Qtz-Kfs rhyolite porphyry                           | Porphyritic with 1-2 mm long phenocrysts of Qtz and Pl , and 1-3 mm long Fe-stained laths of Kfs; Qtz grains range from euhedral to rounded to embayed to glomerocrystic to skeletal. Phenocrysts set in a fine-grained groundmass of Ser, Qtz, Fs and Fe-Ti oxide. Pyrite cubes up to 1 cm across observed locally in the field. | 40      | 30      | 25     |        |         | 5      |         | Zrn, Rt                                   | Fe-staining of Kfs                                                                                      |
| 22              | 81A5       | 67.9 ± 1.1                          | intrusion N of Mt Veta                                                   | 64.21326                   | -143.00528                  | Bt-Hbl granite                                      | Medium-grained, hypidiomorphic granular; Kfs mostly as anhedral masses between euhedral, 1-3 mm Pl laths and anhedral Qtz grains, and less commonly as 5 mm diameter subhedral phenocrysts; Bt books 1-3 mm and Hbl prisms 1-5 mm in diameter.                                                                                    | 30      | 30      | 30     | 7      | 3       |        |         | Fe-Ti oxide, Zrn, Ap                      | Minor and local Bt to Chl and Fs to clay                                                                |
| 23              | 129A5      | 67.7 ± 0.7                          | intrusion between splays of Kechumstuk fault zone N of Mitchell prospect | 64.11456                   | -143.01266                  | Fine-grained Bt granite                             | Fine-grained, hypidiomorphic equigranular texture composed of ~1 mm long euhedral Pl laths, anhedral Qtz, and interstitial Kfs. Scattered, uncommon, irregular subequant Kfs to 1 cm. Qtz grains are irregular in shape and poikilitic due to abundant embayments and former melt inclusions.                                     | 30      | 30      | 40     | <1     |         |        |         | FeTi oxide, Ttn, Ep                       | Moderate; Bt to Chl and Pl to clay                                                                      |

| Map No. | Sample No. | SHRIMP U-Pb zircon age <sup>1</sup> | Location / body name                                                                  | Latitude in decimal degree | Longitude in decimal degree | Rock name (minerals listed in decreasing abundance) | Texture                                                                                                                                                                                                                                                                                                                                   | Qtz (%) | Kfs (%) | Pl (%) | Bt (%)                         | Hbl (%) | Ms (%) | Cpx (%)               | Accessory minerals (decreasing abundance) | Alteration (degree; minerals)                                                              |
|---------|------------|-------------------------------------|---------------------------------------------------------------------------------------|----------------------------|-----------------------------|-----------------------------------------------------|-------------------------------------------------------------------------------------------------------------------------------------------------------------------------------------------------------------------------------------------------------------------------------------------------------------------------------------------|---------|---------|--------|--------------------------------|---------|--------|-----------------------|-------------------------------------------|--------------------------------------------------------------------------------------------|
| 24      | 08ADb14    | 67.0 ± 1.5                          | Mt. Fairplay                                                                          | 63.68194                   | -142.25806                  | Ksp-megacrystic Cpx-Hbl-Bt syenite                  | Gray, prismatic, aligned, 2-6 cm-long Ksp megacrysts make up ~30% of the rock and occur within a medium-grained, equigranular matrix of Ksp, Pl, Cpx (augite?) and fine-grained clots of Bt. Megacrysts contain striae of inclusion rich and inclusion free areas perpendicular to length of the megacryst.                               |         | 55      | 30     | 2                              | 3       |        | 10                    | Zrn, badlyite, Ttn, Ap                    | Moderate; Cpx to Hbl and Bt on rims; Fe-Ti oxide to Bt on rims (1 grain with Ep inbetween) |
| 25      | 08ADb13    | 66.5 ± 1.1                          | Mt. Fairplay                                                                          | 63.65472                   | -142.29028                  | Equigranular Hbl-Bt Qtz monzonite                   | Medium-grained, hypidiomorphic granular; Hbl forms anhedral to subhedral grains up to 4 mm in diameter; Bt smaller grains within Hbl clots.                                                                                                                                                                                               | 5       | 50      | 35     | 3                              | 7       |        | Trace                 | Fe-Ti oxide, Zrn                          | Strong for Kfs to clay; Moderate for Hbl and Bt to Chl and Pl to Ser                       |
| 26      | 08ADb19    | 65.8 ± 1.5                          | intrusion N of Mt Veta                                                                | 64.23611                   | -143.08278                  | Bt-Hbl granite                                      | Medium-grained, hypidiomorphic granular; 2 mm phenocrysts of equant Bt and tabular Hbl grains; Pl mostly euhedral laths (aver. 4 mm, up to 8 mm); Kfs mostly interstitial, anhedral, but rare laths to 5 mm and rimmed with myrmekite                                                                                                     | 20      | 35      | 40     | 6                              | 4       |        | Trace (rimmed by Hbl) | Fe-Ti oxide, Ap, Zrn                      | Moderate; Hbl to Bt, and Pl to clay                                                        |
| 27      | 08ADb03    | 65.8 ± 1.4                          | intrusion N of Mt Veta                                                                | 64.2175                    | -142.90889                  | Bt granite                                          | Medium-grained, hypidiomorphic granular; Qtz occurs as concentrations of subhedral to euhedral grains; Bt generally forms subhedral 1 mm equant grains; Kfs forms interstitial, anhedral, locally poikilitic masses up to 5 mm long; plagioclase occurs as ~1 mm laths                                                                    | 20      | 40      | 35     | 5                              | Trace   |        |                       |                                           | Minor; Kfs to clay                                                                         |
| 28      | 140A5      | ≤ ~ 65                              | dike adjacent to splay of Kechumstuk fault zone and cutting pluton of Kechumstuk Mtn. | 64.02187                   | -143.09274                  | Fine-grained microporphyritic aplite                | Fine-grained hypidiomorphic granular. Qtz commonly consists of composite 0.25 mm-long clots of subhedral grains; scattered larger Qtz phenocrysts to 2 mm impart a microporphyritic texture. Pl shows compositional zoning marked by greater clay alteration of cores. Ksp in patches of sub-equant grains. Narrow veinlets/shears of Ep. | 30      | 32      | 35     | 3 (prior to alteration to Chl) |         |        |                       | Act, Ep, Fe-Ti oxide, Zrn, Ap             | Moderate Pl to clay. Strong Bt to Chl                                                      |

<sup>1</sup> SHRIMP U-Pb zircon data for samples from the Middle Fork caldera (Map Nos. 19 and 20) are given in Bacon et al. (2014).

Mineral Abbreviations: Act, actinolite; Aln, allanite; Ap, apatite; Bt, biotite; Cal, calcite; Chl, chlorite; Cpx, clinopyroxene; Ep, epidote; Fs, feldspar; Hbl, hornblende; Ilm, ilmenite; Kfs, K-feldspar; Mag, magnetite; Ms, muscovite; Pl, plagioclase; Qtz, quartz; Rt, rutile; Ser, sericite; Ttn, titanite; Zo, zoisite; Zrn, zircon.
